# Supplementary material
Source: PubMed Central journal article supplement (PMC7007326)
Supplement: NIHMS1041965-supplement-Supplemental_Material.pdf [file NIHMS1041965-supplement-Supplemental_Material.pdf]

Online Supplemental Table 1

|                              | G1<br>( <i>n</i> = 85) | G2<br>( <i>n</i> = 43) | G3<br>( <i>n</i> = 73) | G4<br>( <i>n</i> = 32) |
|------------------------------|------------------------|------------------------|------------------------|------------------------|
|                              | <i>M</i> ( <i>SD</i> ) |
| <b>Women</b>                 |                        |                        |                        |                        |
| Age                          | 41.44 (11.34)          | 42.00 (8.08)           | 40.07 (9.35)           | 37.88 (9.42)           |
| Income                       | 28348 (27558)          | 28773 (32098)          | 23174 (25626)          | 24640 (19801)          |
| Education Level              | 14.73 (2.44)           | 14.11 (2.28)           | 13.60 (1.97)           | 14.72 (2.57)           |
| Marital Satisfaction         | 32.92 (13.74)          | 21.27 (11.03)          | 18.28 (10.08)          | 21.87 (14.33)          |
| <b>Men</b>                   |                        |                        |                        |                        |
| Age                          | 42.78 (11.29)          | 43.23 (9.45)           | 42.40 (9.72)           | 40.88 (10.32)          |
| Income                       | 59168 (57593)          | 57987 (34844)          | 51215 (34624)          | 61094 (39928)          |
| Education Level              | 14.83 (2.56)           | 13.94 (2.13)           | 13.27 (2.22)           | 14.92 (2.92)           |
| Marital Satisfaction         | 42.29 (4.93)           | 37.22 (7.57)           | 34.87 (11.26)          | 39.16 (9.97)           |
| <b>Either partner report</b> |                        |                        |                        |                        |
| <b>Male-to-Female</b>        |                        |                        |                        |                        |
| <b>Physical IPV</b>          |                        |                        |                        |                        |
| Frequency                    | 0.47 (0.21)            | 0.23 (0.43)            | 23.44 (37.41)          | 4.78 (5.55)            |
| <b>Female-to-Male</b>        |                        |                        |                        |                        |
| <b>Physical IPV</b>          |                        |                        |                        |                        |
| Frequency                    | 0.40 (1.47)            | 3.30 (7.18)            | 20.99 (34.64)          | 6.34 (7.78)            |

G1 = satisfied/nonIPV couples, G2 = distressed/nonIPV couples, G3 = distressed/IPV couples, G4 = satisfied/IPV couples.

Online Supplemental Table 2

|                          | Total Sample<br>( <i>N</i> = 233) | At Least One Member<br>High on Flooding<br>( <i>n</i> = 78) | No Members<br>High on Flooding<br>( <i>n</i> = 155) |
|--------------------------|-----------------------------------|-------------------------------------------------------------|-----------------------------------------------------|
|                          | <i>M</i> ( <i>SD</i> )            | <i>M</i> ( <i>SD</i> )                                      | <i>M</i> ( <i>SD</i> )                              |
| <b>GAPS</b>              |                                   |                                                             |                                                     |
| Proposed viable solution | 2.65 (1.02)                       | 2.29 (1.01)                                                 | 2.83 (0.97)                                         |
| Weighed pros/cons        | 2.28 (0.99)                       | 1.88 (0.85)                                                 | 2.48 (1.00)                                         |
| Operationalize Plans     | 1.73 (1.01)                       | 1.35 (0.68)                                                 | 1.93 (1.09)                                         |
| Follow-through           | 2.11 (1.16)                       | 1.60 (1.00)                                                 | 2.37 (1.16)                                         |
| Resolution               | 2.13 (1.14)                       | 1.54 (0.91)                                                 | 2.43 (1.13)                                         |
| Global Progress          | 2.67 (0.73)                       | 2.35 (0.70)                                                 | 2.83 (0.69)                                         |

GAPS = Global Assessment of Problem Solving; Wife Typical Topic

Online Supplement 3

**Intimate Partner Flooding Scale**

**Instructions:** Please use the following scale to rate how often you feel this way when you have conflicts with your partner.

Almost Always  
Often  
Sometimes  
Rarely  
Never

- |                                                                       |   |   |   |   |   |
|-----------------------------------------------------------------------|---|---|---|---|---|
| 1. I find my partner's anger to be overwhelming.                      | 1 | 2 | 3 | 4 | 5 |
| 2. My partner tends to explode without warning signs.                 | 1 | 2 | 3 | 4 | 5 |
| 3. I get all jumbled when my partner is angry with me.                | 1 | 2 | 3 | 4 | 5 |
| 4. I get so stressed when my partner blows up at me that I shut down. | 1 | 2 | 3 | 4 | 5 |
| 5. My brain short-circuits when my partner gets angry.                | 1 | 2 | 3 | 4 | 5 |
| 6. My partner's anger seems to come out of nowhere.                   | 1 | 2 | 3 | 4 | 5 |
| 7. My partner's anger overpowers me.                                  | 1 | 2 | 3 | 4 | 5 |
| 8. Anger from my partner makes me unable to focus.                    | 1 | 2 | 3 | 4 | 5 |
| 9. The intensity of my partner's anger catches me off guard.          | 1 | 2 | 3 | 4 | 5 |
| 10. I feel flooded by my partner's anger.                             | 1 | 2 | 3 | 4 | 5 |
| 11. I can't predict when my partner will blow up at me                | 1 | 2 | 3 | 4 | 5 |
| 12. I feel paralyzed during my partner's angry outbursts.             | 1 | 2 | 3 | 4 | 5 |
| 13. I'm taken aback by how angry my partner gets during an argument.  | 1 | 2 | 3 | 4 | 5 |
| 14. My partner's anger leaves me feeling disorganized and stressed.   | 1 | 2 | 3 | 4 | 5 |
| 15. I can't think straight when my partner is angry with me.          | 1 | 2 | 3 | 4 | 5 |

All items are reversed scored. Replace "partner" with husband or wife for spouse-specific versions.
